# Supplementary material for: Light Activates Output from Evening Neurons and Inhibits Output from Morning Neurons in the Drosophila Circadian Clock
Source: PubMed Central journal article supplement (PMC2229858; doi:10.1371/journal.pbio.0050315), 2007-11-27
Supplement: pbio.0050315.sg001.pdf [file pbio.0050315.sg001.pdf]

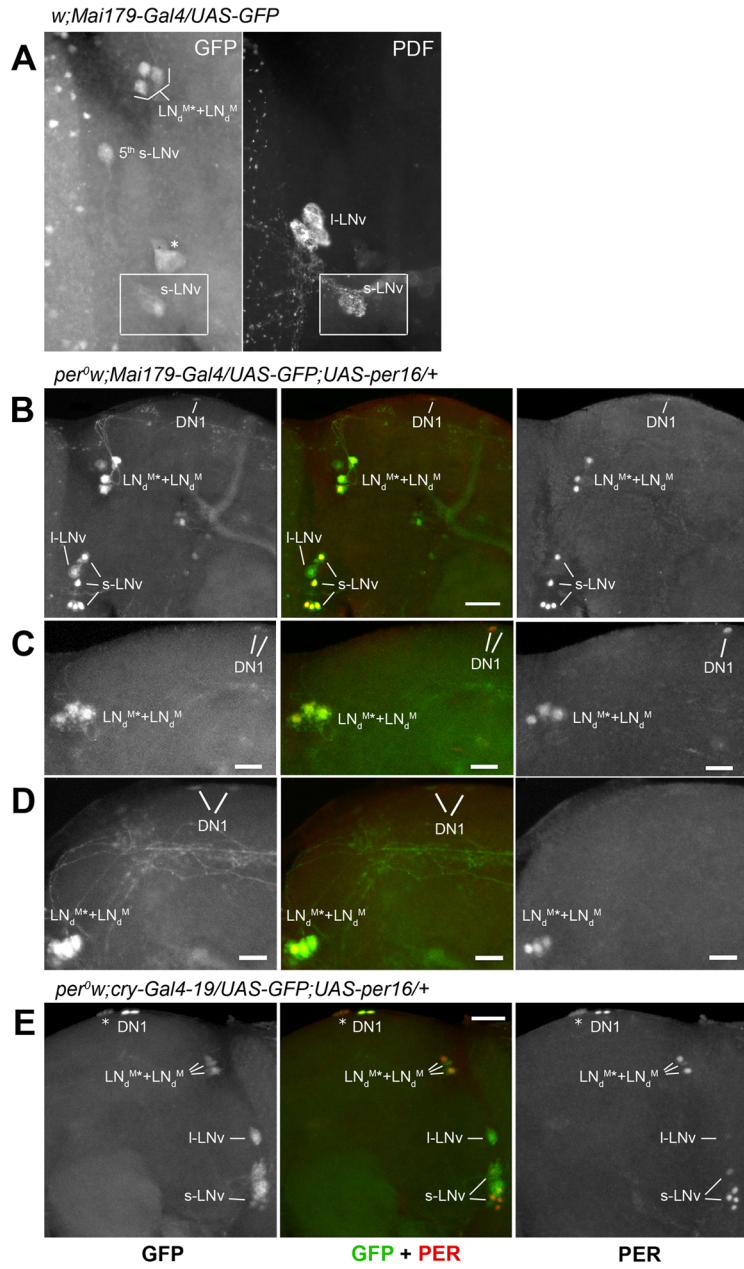

Supplementary Fig. 1 : Characterization of the Mai179-Gal4 and cry-Gal4-19 expression patterns
