# Supplementary material for: Light Activates Output from Evening Neurons and Inhibits Output from Morning Neurons in the Drosophila Circadian Clock
Source: PubMed Central journal article supplement (PMC2229858; doi:10.1371/journal.pbio.0050315), 2007-11-27
Supplement: pbio.0050315.sg003.pdf [file pbio.0050315.sg003.pdf]

*per<sup>0w</sup>;Mai179-Gal4/pdf-Gal80;UAS-per16 cry<sup>b</sup> ss/cry<sup>b</sup> ss*

**A**

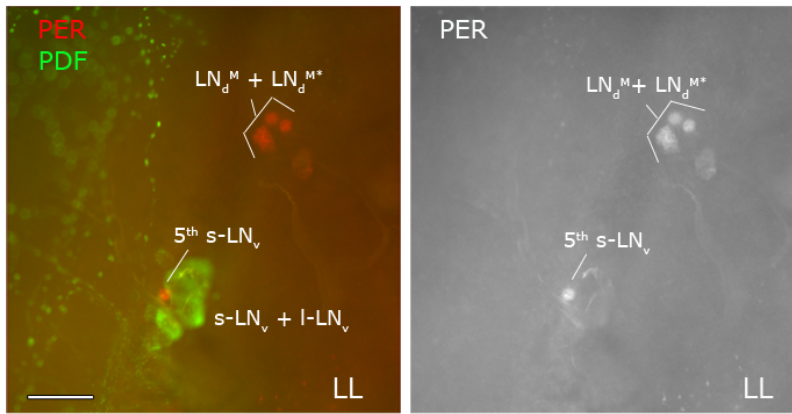

R

*per<sup>0w</sup>;Mai179-Gal4/pdf-Gal80;UAS-per16/+*

**B**

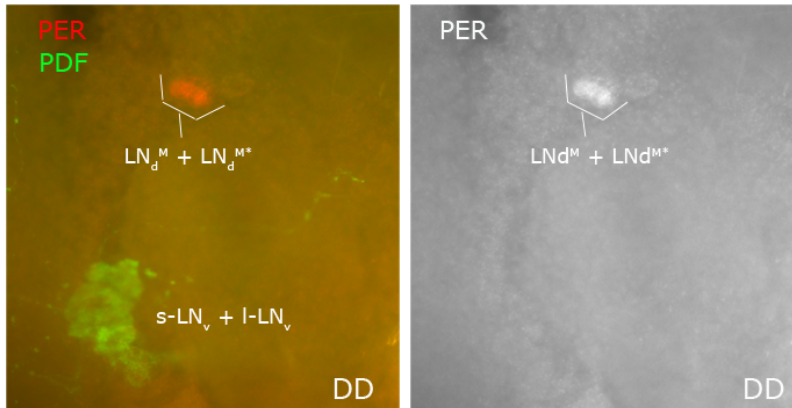

AR

*per<sup>0w</sup>;cry-Gal4-19/pdf-Gal80;UAS-per16/+*

**C**

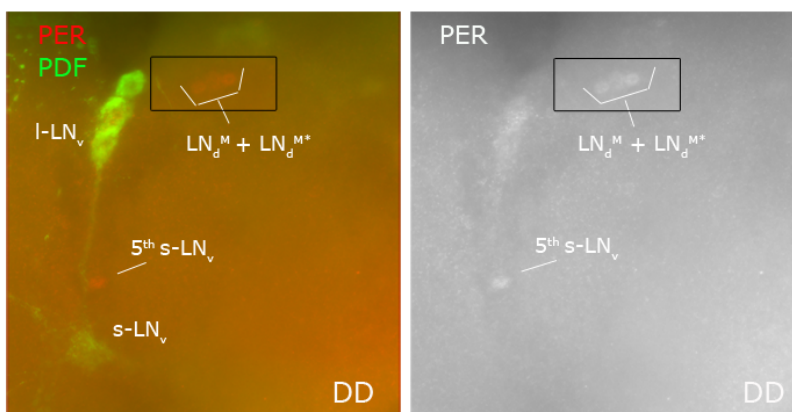

AR

*per<sup>0w</sup>;pdf-Gal4/+;UAS-per16/+*

**D**

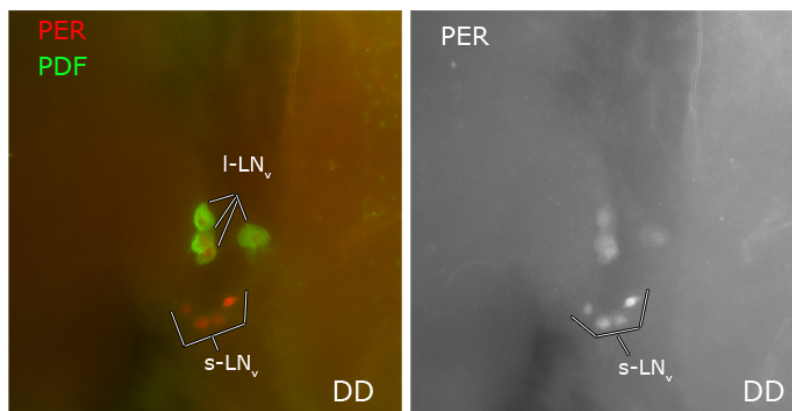

R

Supplementary Fig. 3: PER immunoreactivity in the LNs of PER-rescued flies in LL or DD
