# Supplementary material for: Light Activates Output from Evening Neurons and Inhibits Output from Morning Neurons in the Drosophila Circadian Clock
Source: PubMed Central journal article supplement (PMC2229858; doi:10.1371/journal.pbio.0050315), 2007-11-27
Supplement: pbio.0050315.sg004.pdf [file pbio.0050315.sg004.pdf]

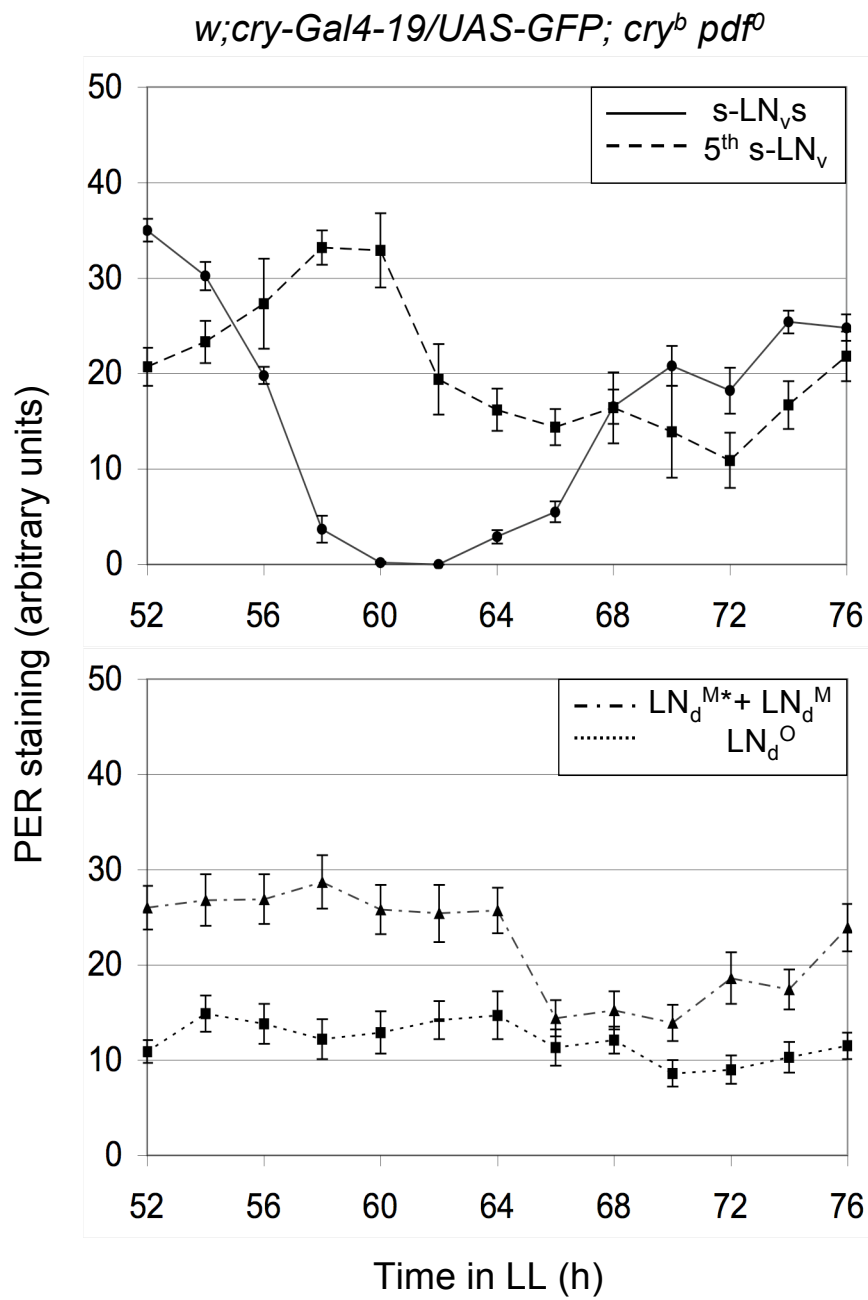

Suppl. Figure 4 : PER oscillations in *cry<sup>b</sup> pdf<sup>0</sup>* flies in constant light
