# Supplementary material for: Light Activates Output from Evening Neurons and Inhibits Output from Morning Neurons in the Drosophila Circadian Clock
Source: PubMed Central journal article supplement (PMC2229858; doi:10.1371/journal.pbio.0050315), 2007-11-27
Supplement: pbio.0050315.st001.pdf [file pbio.0050315.st001.pdf]

| Genotype                                        | Total flies (n) | Rhythmic flies (%) | Period (h) |   |     | Power |   |   | Activity |   |   |
|-------------------------------------------------|-----------------|--------------------|------------|---|-----|-------|---|---|----------|---|---|
| <i>yw;pdf-Gal4/+;cry<sup>b</sup> ss</i>         | 31              | 84%                | 25.2       | ± | 0.1 | 91    | ± | 7 | 13       | ± | 1 |
| <i>w:cry-Gal4-19/+;cry<sup>b</sup> ss</i>       | 16              | 69%                | 25.4       | ± | 0.3 | 59    | ± | 8 | 23       | ± | 3 |
| <i>yw;pdf-Gal80/CyO;cry<sup>b</sup> ss</i>      | 16              | 100%               | 24.9       | ± | 0.1 | 149   | ± | 8 | 10       | ± | 1 |
| <i>yw:UAS-cry/+;cry<sup>b</sup> ss</i>          | 16              | 100%               | 25.5       | ± | 0.1 | 111   | ± | 9 | 17       | ± | 1 |
| <i>yw;;UAS-per16cryb/cry<sup>b</sup>ss</i>      | 62              | 98%                | 24.8       | ± | 0.1 | 100   | ± | 4 | 12       | ± | 1 |
| <i>yw:tim-Gal4/UAS-GFP:cry<sup>b</sup> ss</i>   | 47              | 91%                | 24.9       | ± | 0.1 | 83    | ± | 5 | 14       | ± | 2 |
| <i>yw;pdf-Gal4/UAS-GFP:cry<sup>b</sup> ss</i>   | 31              | 90%                | 25.0       | ± | 0.1 | 100   | ± | 8 | 13       | ± | 1 |
| <i>w:Mail79-Gal4/UAS-GFP:cry<sup>b</sup> ss</i> | 70              | 93%                | 25.0       | ± | 0.1 | 86    | ± | 4 | 15       | ± | 1 |
| <i>w:cry-Gal4-19/UAS-GFP:cry<sup>b</sup> ss</i> | 44              | 89%                | 25.1       | ± | 0.2 | 99    | ± | 7 | 16       | ± | 1 |

**Supplementary Table 1 :**

**Locomotor activity rhythms of control flies.** The mean values of circadian period (h), associated powers (see Methods) and activities (number of events per 0,5h) are given ± s.e.m.
